# Supplementary material for: Face expectancy cues differentially modulate conflict processing driven by emotional incongruence: An EEG study
Source: Research Square preprint supplement (doi:10.21203/rs.3.rs-7440652/v1), 2025-10-08
Supplement: Supplementary file 1 [file 1cb4ab95c846993064a9fcc0.docx]

**Supplementary Material**

**Hit Rate differences between conditions**

| **Condition** | **Hit rate (%)** | | | |
| --- | --- | --- | --- | --- |
|  | **Minimum** | **Maximum** | **Mean** | **SD** |
| CL: Congruent trials | 84 | 100 | 95.3 | 3.83 |
| CL: Incongruent trials | 84 | 100 | 95.9 | 4.17 |
| LF: Congruent trials | 87 | 100 | 96.0 | 3.86 |
| LF: Incongruent trials | 89 | 100 | 96.7 | 3.55 |
| FF: Congruent trials | 85 | 100 | 97.2 | 3.38 |
| FF: Incongruent trials | 90 | 100 | 97.4 | 3.12 |

**TABLE S1.** HIT RATE BETWEEN CONDITIONS. CL REFERS TO THE CLASSICAL FACE EMOTIONAL STROOP CONDITION, LF REFERS TO THE LABEL-FIRST CONDITION AND FF REFERS TO THE FACE-FIRST CONDITION. THE MINIMUM, THE MAXIMUM, AND THE MEAN PERCENTAGE ARE SHOWN FOR CONGRUENT AND INCONGRUENT TRIALS OF EACH CONDITION. THE STANDARD DEVIATION (SD) OF THE HIT RATE IS PRESENTED.
